# Supplementary material
Source: publisher figshare collection journal article supplement (https://asha.figshare.com/ndownloader/files/29088651)
Supplement: Supplementary file 1 [file 29088651]

**Supplemental Material S1.** Additional language exposure details for BI-TD and BI-DLD groups.

| Measure               | BI-TD    |           | BI-DLD   |           | <i>t</i> ( <i>df</i> ) | <i>p</i> | <i>d</i> |
|-----------------------|----------|-----------|----------|-----------|------------------------|----------|----------|
|                       | <i>M</i> | <i>SD</i> | <i>M</i> | <i>SD</i> |                        |          |          |
| Input from caregiver  | 80.8%    | 13.3%     | 83.0%    | 15.5%     | -0.60 (54)             | .53      | -0.16    |
| Output to caregiver   | 66.3%    | 21.5%     | 65.0%    | 29.4%     | 0.17 (51.3)            | .86      | 0.05     |
| Input from siblings   | 32.1%    | 31.9%     | 34.2%    | 31.6%     | -0.24(49)              | .81      | -0.07    |
| Output to siblings    | 34.2%    | 30.7%     | 36.2%    | 32.1%     | -0.22 (49)             | .83      | -0.06    |
| Total home proportion | 57.6%    | 19.0%     | 56.2%    | 23.1%     | 0.24 (54)              | .82      | 0.06     |
| Outside proportion    | 31.5%    | 19.1%     | 33.6%    | 18.0%     | 0.43 (54)              | .67      | -0.12    |

*Note.* All values are derived from the Alberta Language Environment Questionnaire. Percentages represent the average amount of exposure in Spanish. Degrees of freedom vary by test because equal variances were not assumed when Levene's test was significant and because not all children had siblings.
